# Supplementary material for: Brain-like optoelectronic artificial synapses with ultralow energy consumption based on MXene floating-gates for emotion recognition
Source: Royal Society of Chemistry journal article supplement (doi:10.1039/d2tc04745d), 2023-01-01
Supplement: d2tc04745d1.pdf [file d2tc04745d1.pdf]

## Supporting Information

### Brain-Like Optoelectronic Artificial Synapse with Ultralow Energy Consumption Based on MXene Floating-Gate for Emotion Recognition

Yixin Cao, Chun Zhao, Tianshi Zhao, Yi Sun, Zhengjun Liu Xianyao Li, Li Yin, Jiangmin Gu, Hao Ren, Xianwei Geng, Jian Yao and Lixing Kang

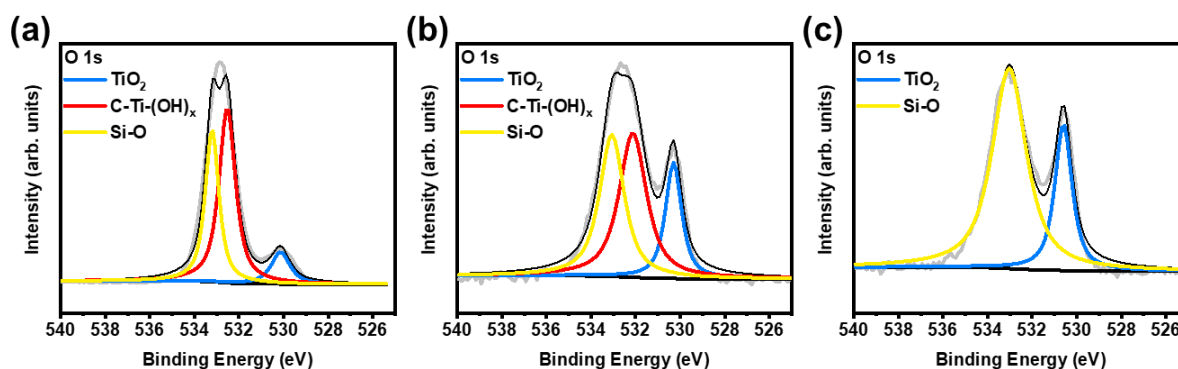

**Figure S1.** O 1s XPS spectra are scanned on the surfaces of (a) the unoxidized oxidized MXene, (b) MXene heated at 60°C for 20 min in air, and (c) MXene heated at 60°C for 3 h in air.

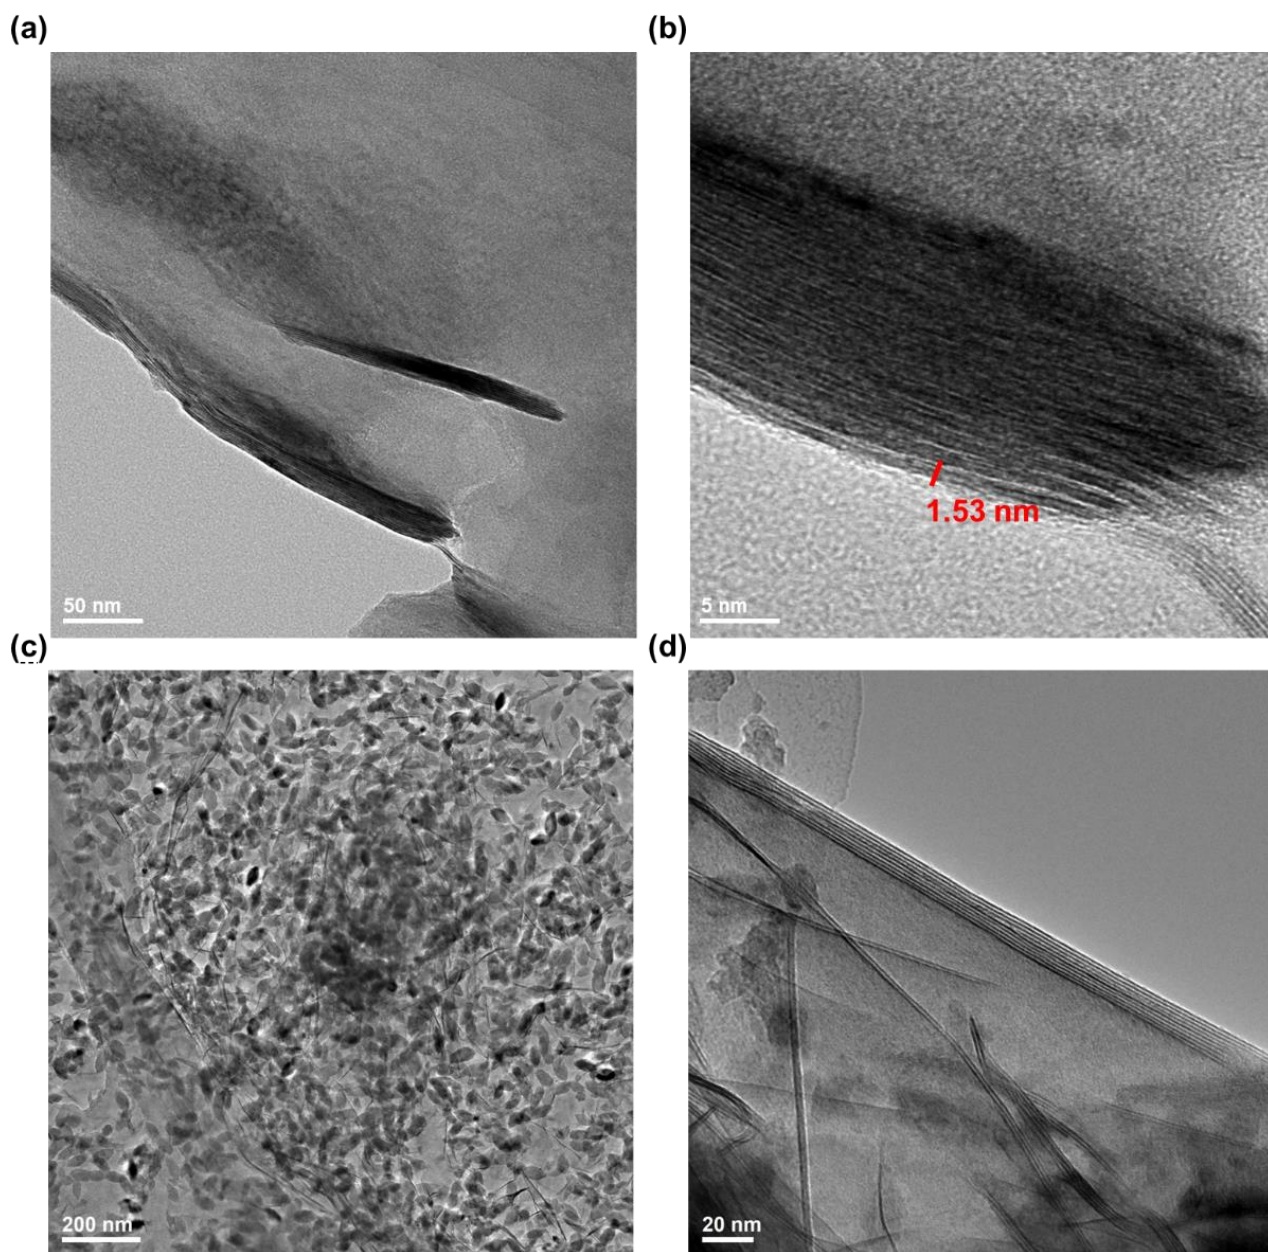

**Figure S2.** (a) HR-TEM results of the unoxidized MXene. (b) Enlarged view from Figure S2a. (c) HR-TEM results of the oxidized MXene. (d) HR-TEM micrographs show the edge of MXene is still a multilayer structure.

(a)

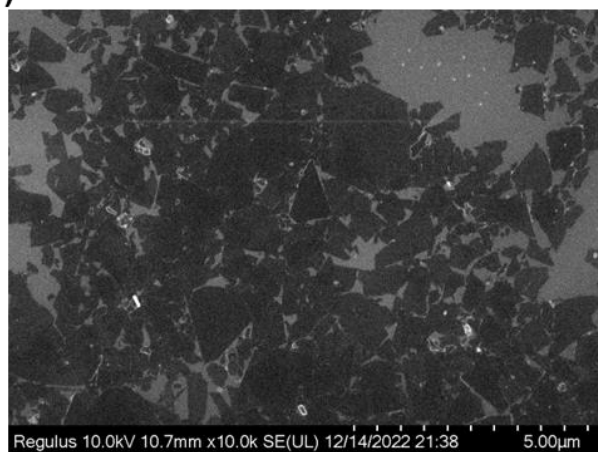

(b)

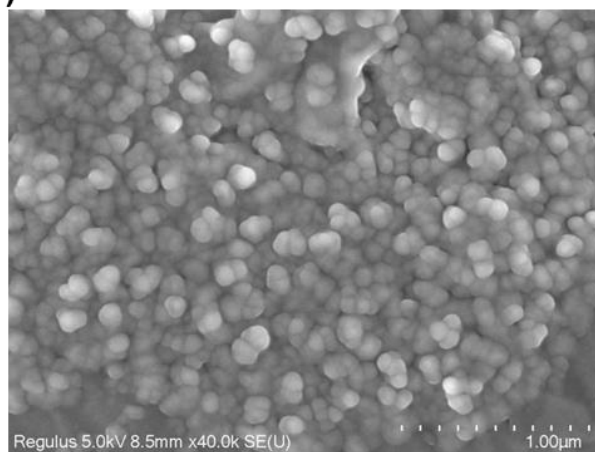

**Figure S3.** SEM micrographs for MXene (a) before and (b) after annealing.

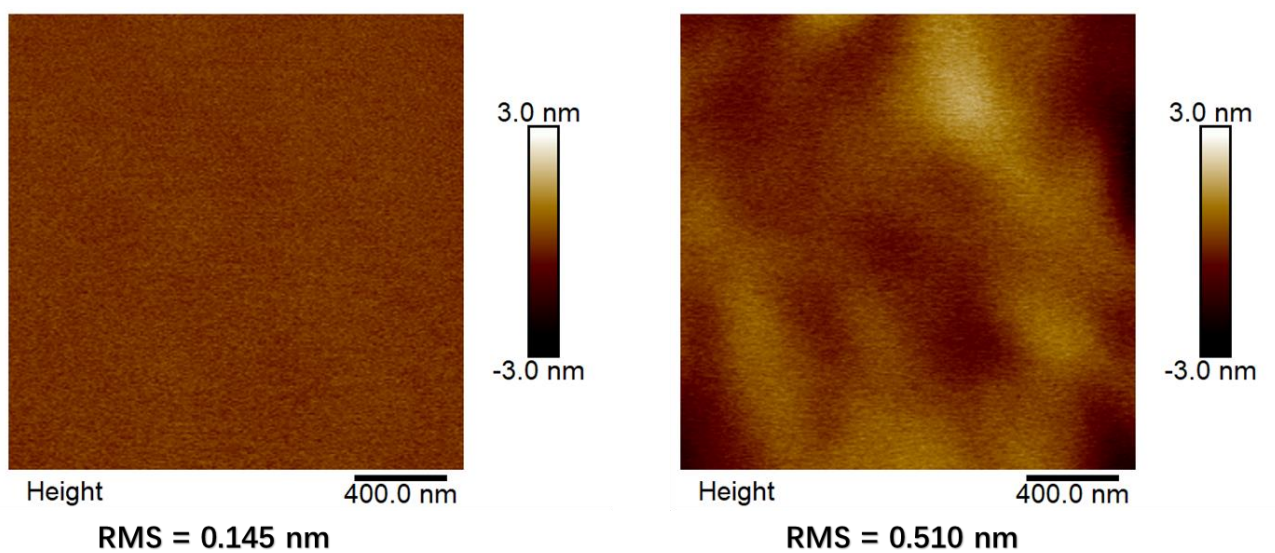

**Figure S4.** AFM images of artificial synapse with and without MXene.

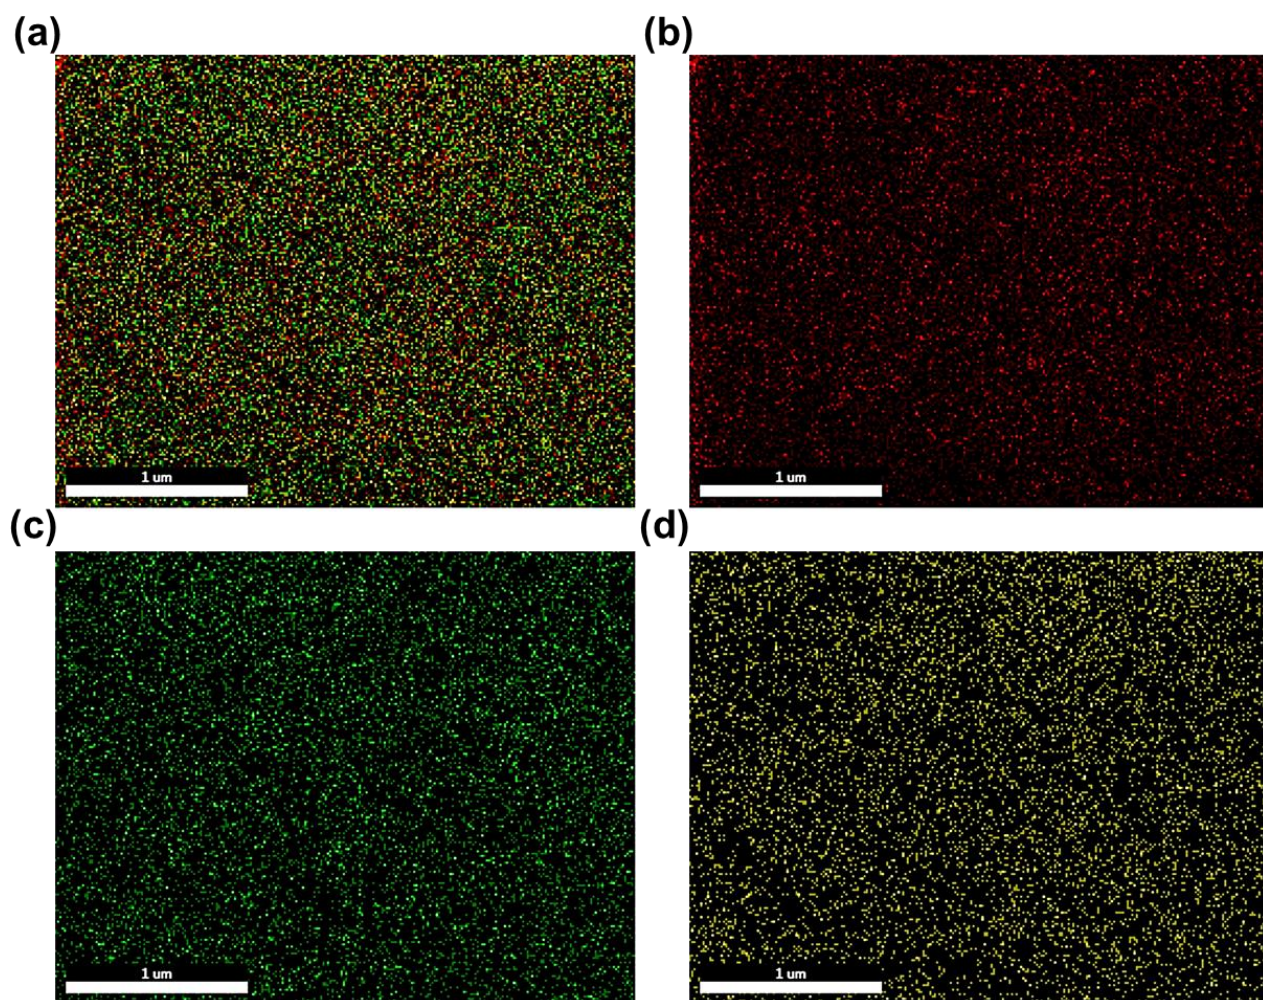

**Figure S5.** (a) EDS results of the oxidized MXene. EDS mapping of (b) C, (c) O, and (d) Ti elements in MXene.

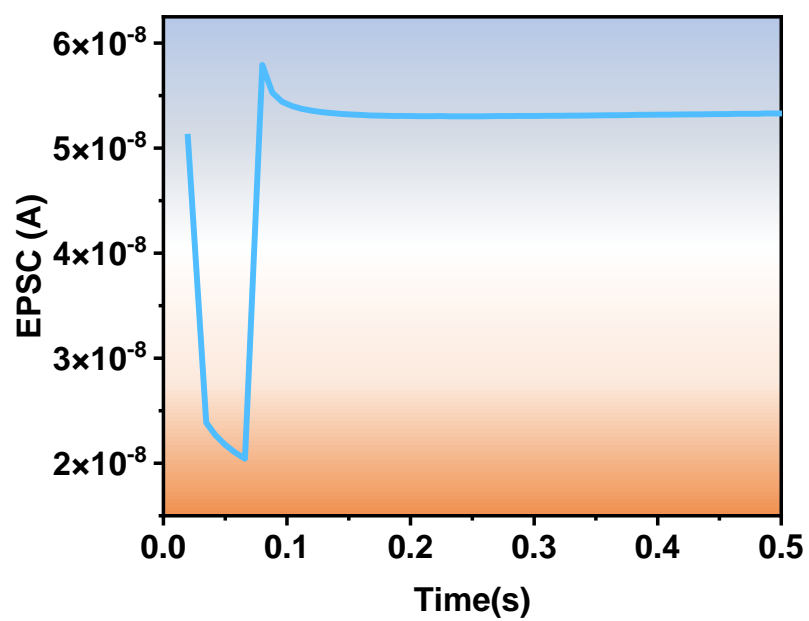

**Figure S6.** EPSC generate by a negative gate electrical pulse,

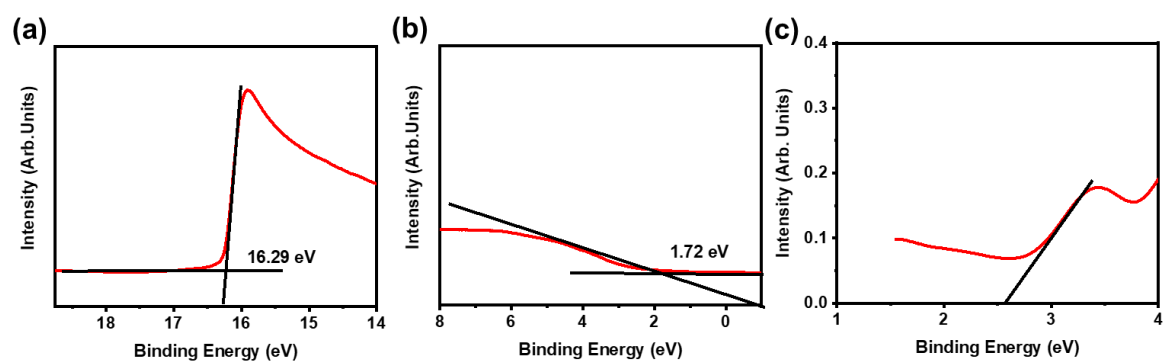

**Figure S7.** The UPS spectra of MXene oxidized in the air for 20 min with (a)  $E_{\text{cutoff}}$  and (b)  $E_{\text{onset}}$ . (c) The UV-Vis spectra of MXene oxidized in the air for 20 min.

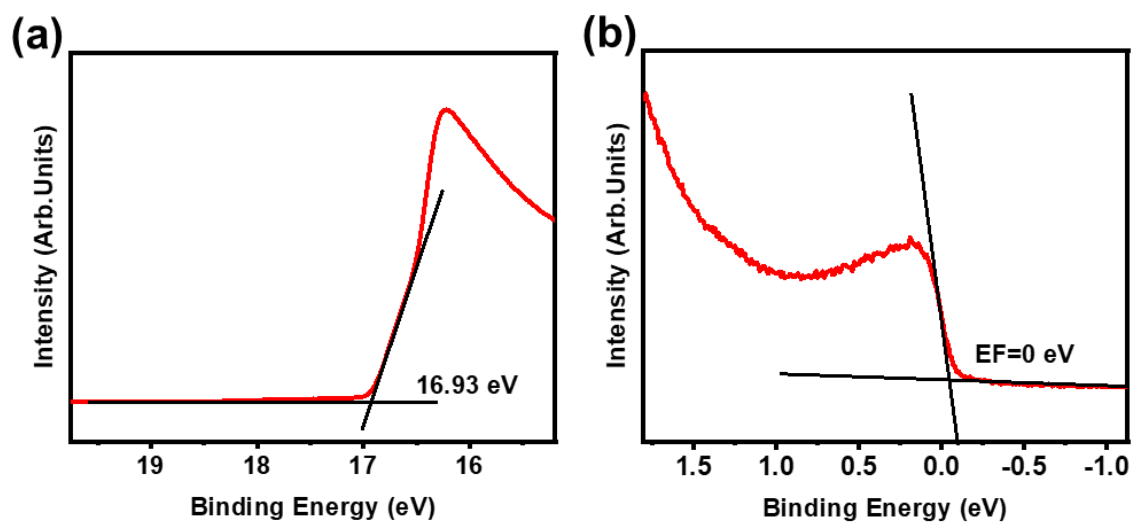

**Figure S8.** The UPS spectra of unoxidized MXene with (a)  $E_{\text{cutoff}}$  and (b)  $E_{\text{onset}}$ .

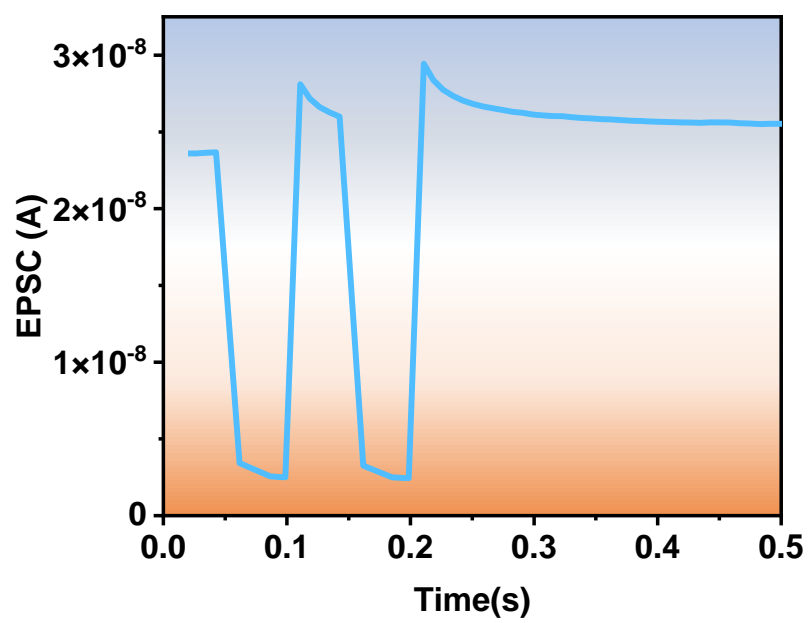

**Figure S9.** EPSC generate by a pair of negative gate electrical pulses.

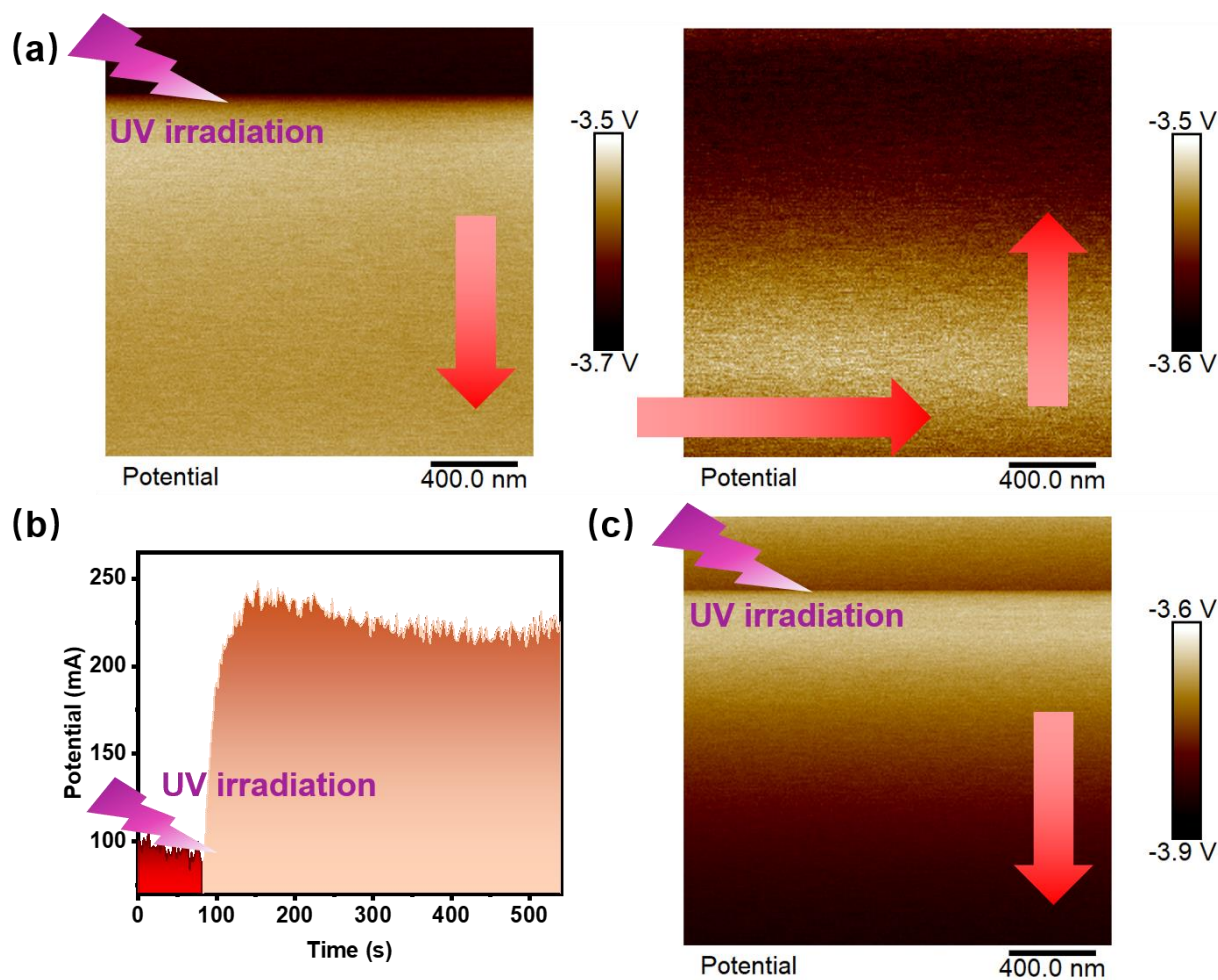

**Figure S10.** (a) Change in the surface potential of the MXene InO<sub>x</sub> films with time. (b) Detailed in-plane ketches of the evolution of the CPD about the MXene InO<sub>x</sub> layer. (c) The change in the surface potential of the InO<sub>x</sub> films with time.
